# Supplementary material for: Is image-to-image translation the panacea for multimodal image registration? A comparative study
Source: PubMed Central journal article supplement (PMC9704666; doi:10.1371/journal.pone.0276196), 2022-11-28
Supplement: pone.0276196.s001.pdf [file pone.0276196.s001.pdf]

**S1 Appendix. List of abbreviations (and method names) used in the paper:**

|               |                                                                            |
|---------------|----------------------------------------------------------------------------|
| $\alpha$ -AMD | - $\alpha$ -cut based Average Minimal Distance                             |
| ADAM          | - ADaptive Moment estimation                                               |
| ASGD          | - Adaptive Stochastic Gradient Descent                                     |
| BF            | - Brightfield (microscopy)                                                 |
| CC            | - Cross-Correlation                                                        |
| cGAN          | - conditional Generative Adversarial Network                               |
| CoMIR         | - Contrastive Multimodal Image Representation for registration [29]        |
| CurveAlign    | - registration method designed for BF and SHG images [28]                  |
| CycleGAN      | - Cycle-consistent (Generative) Adversarial Network [14]                   |
| DCNN          | - Deep Convolutional Neural Network                                        |
| DRIT++        | - Diverse Image-to-Image Translation via Disentangled Representations [17] |
| FID           | - Fréchet Inception Distance                                               |
| GAN           | - Generative Adversarial Network                                           |
| GPU           | - Graphics Processing Unit                                                 |
| I2I           | - Image-to-Image (translation)                                             |
| InfoNCE       | - (Info) Noise-Contrastive Estimation                                      |
| MI            | - Mutual Information                                                       |
| MIND          | - Modality Independent Neighbourhood Descriptor                            |

|           |                                                                                                                            |
|-----------|----------------------------------------------------------------------------------------------------------------------------|
| MSD       | - Mean Squared Difference                                                                                                  |
| MR        | - Magnetic Resonance                                                                                                       |
| NGF       | - Normalised Gradient Fields                                                                                               |
| NIR       | - Near-Infrared                                                                                                            |
| ORB       | - Oriented FAST (Features from Accelerated Segment Test) and rotated BRIEF (Binary Robust Independent Elementary Features) |
| pix2pix   | - Image-to-Image Translation with Conditional Adversarial Networks [13]                                                    |
| px        | - pixel                                                                                                                    |
| QPI       | - Quantitative Phase Imaging                                                                                               |
| RANSAC    | - RANdom SAmple Consensus                                                                                                  |
| RGB       | - Red-Green-Blue (color model)                                                                                             |
| RIRE      | - Retrospective Image Registration Evaluation (dataset)                                                                    |
| SGD       | - Stochastic Gradient Descent                                                                                              |
| SHG       | - Second Harmonic Generation                                                                                               |
| SIFT      | - Scale Invariant Feature Transform                                                                                        |
| SSD       | - Sum of Squared Differences                                                                                               |
| StarGANv2 | - Diverse Image Synthesis for Multiple Domains [15]                                                                        |
| TMA       | - Tissue micro-array                                                                                                       |
